# Supplementary material
Source: HighWire-hosted journal article supplement (https://bmjopen.bmj.com/content/12/9/e062525)
Supplement: inline-supplementary-material-6 [file inline-supplementary-material-6.pdf]

# Oxford Maternity Diabetes Treatment Satisfaction Questionnaire (GDM Health & Stay active)

Please indicate your personal agreement with each of the following statements

\* Required

1. Please enter your study participant number \*

2. Visit 1 or 2 \*

☐ Visit 1(initial consultation)

☐ Visit 2 ( approx 36 weeks)

3. I find the equipment I use to check my blood sugars is convenient \*

☐ Strongly agree

☐ Agree

☐ Neutral

☐ Disagree

☐ Strongly disagree

☐ N/a

4. I feel the equipment I use to check my blood sugars is reliable \*

- ☐ Strongly Agree
- ☐ Agree
- ☐ Neutral
- ☐ Disagree
- ☐ Strongly disagree
- ☐ N/A

5. My blood sugar monitoring fits in with my lifestyle \*

- ☐ Strongly Agree
- ☐ Agree
- ☐ Neutral
- ☐ Disagree
- ☐ Strongly disagree
- ☐ N/A

6. The feedback I receive about my blood sugar level is useful \*

- ☐ Strongly Agree
- ☐ Agree
- ☐ Neutral
- ☐ Disagree
- ☐ Strongly disagree
- ☐ N/a

7. I feel the system I use to calculate carbohydrate is convenient \*

- ☐ Strongly agree
- ☐ Agree
- ☐ Neutral
- ☐ Disagree
- ☐ Strongly disagree
- ☐ N/A

8. I feel the system I use to calculate carbohydrate is reliable \*

- ☐ Strongly agree
- ☐ Agree
- ☐ Neutral
- ☐ Disagree
- ☐ Strongly disagree
- ☐ N/a

9. I feel the feedback I receive about my carbohydrate intake is useful \*

- ☐ Strongly agree
- ☐ Agree
- ☐ Neutral
- ☐ Disagree
- ☐ Strongly disagree
- ☐ N/A

10. I feel the system I use to record my weight is convenient \*

- ☐ Strongly agree
- ☐ Agree
- ☐ Neutral
- ☐ Disagree
- ☐ Strongly disagree
- ☐ N/A

11. I feel the system I use to record my weight is useful \*

- ☐ Strongly agree
- ☐ Agree
- ☐ Neutral
- ☐ Disagree
- ☐ Strongly disagree
- ☐ N/A

12. I feel the system I use to measure my physical activity/exercise level is convenient \*

- ☐ Strongly agree
- ☐ Agree
- ☐ Neutral
- ☐ Disagree
- ☐ Strongly disagree
- ☐ N/A

13. I feel the feedback I receive about my physical activity/exercise levels is useful \*

- ☐ Strongly agree
- ☐ Agree
- ☐ Neutral
- ☐ Disagree
- ☐ Strongly disagree
- ☐ N/A

14. How often would you have liked feedback? \*

- ☐ Daily
- ☐ Every 2-3 days
- ☐ Every 4-5 days
- ☐ Weekly
- ☐ Only when necessary
- ☐ N/A

15. Is there a particular area where you would have liked more feedback? \*

- ☐ Blood glucose
- ☐ Carbohydrate intake
- ☐ Physical Activity/Exercise
- ☐ Weight gain
- ☐ None

16. Please use box below for any further comments: Particular regarding the Stay-Active App (ease of use & recommendation to the others)

---

This content is neither created nor endorsed by Microsoft. The data you submit will be sent to the form owner.

 Microsoft Forms
